# Supplementary material
Source: Springer Nature journal article supplement (https://www.springermedizin.de/resource/supplementary/13012_2009_215_MOESM2_ESM.pdf/9629504)

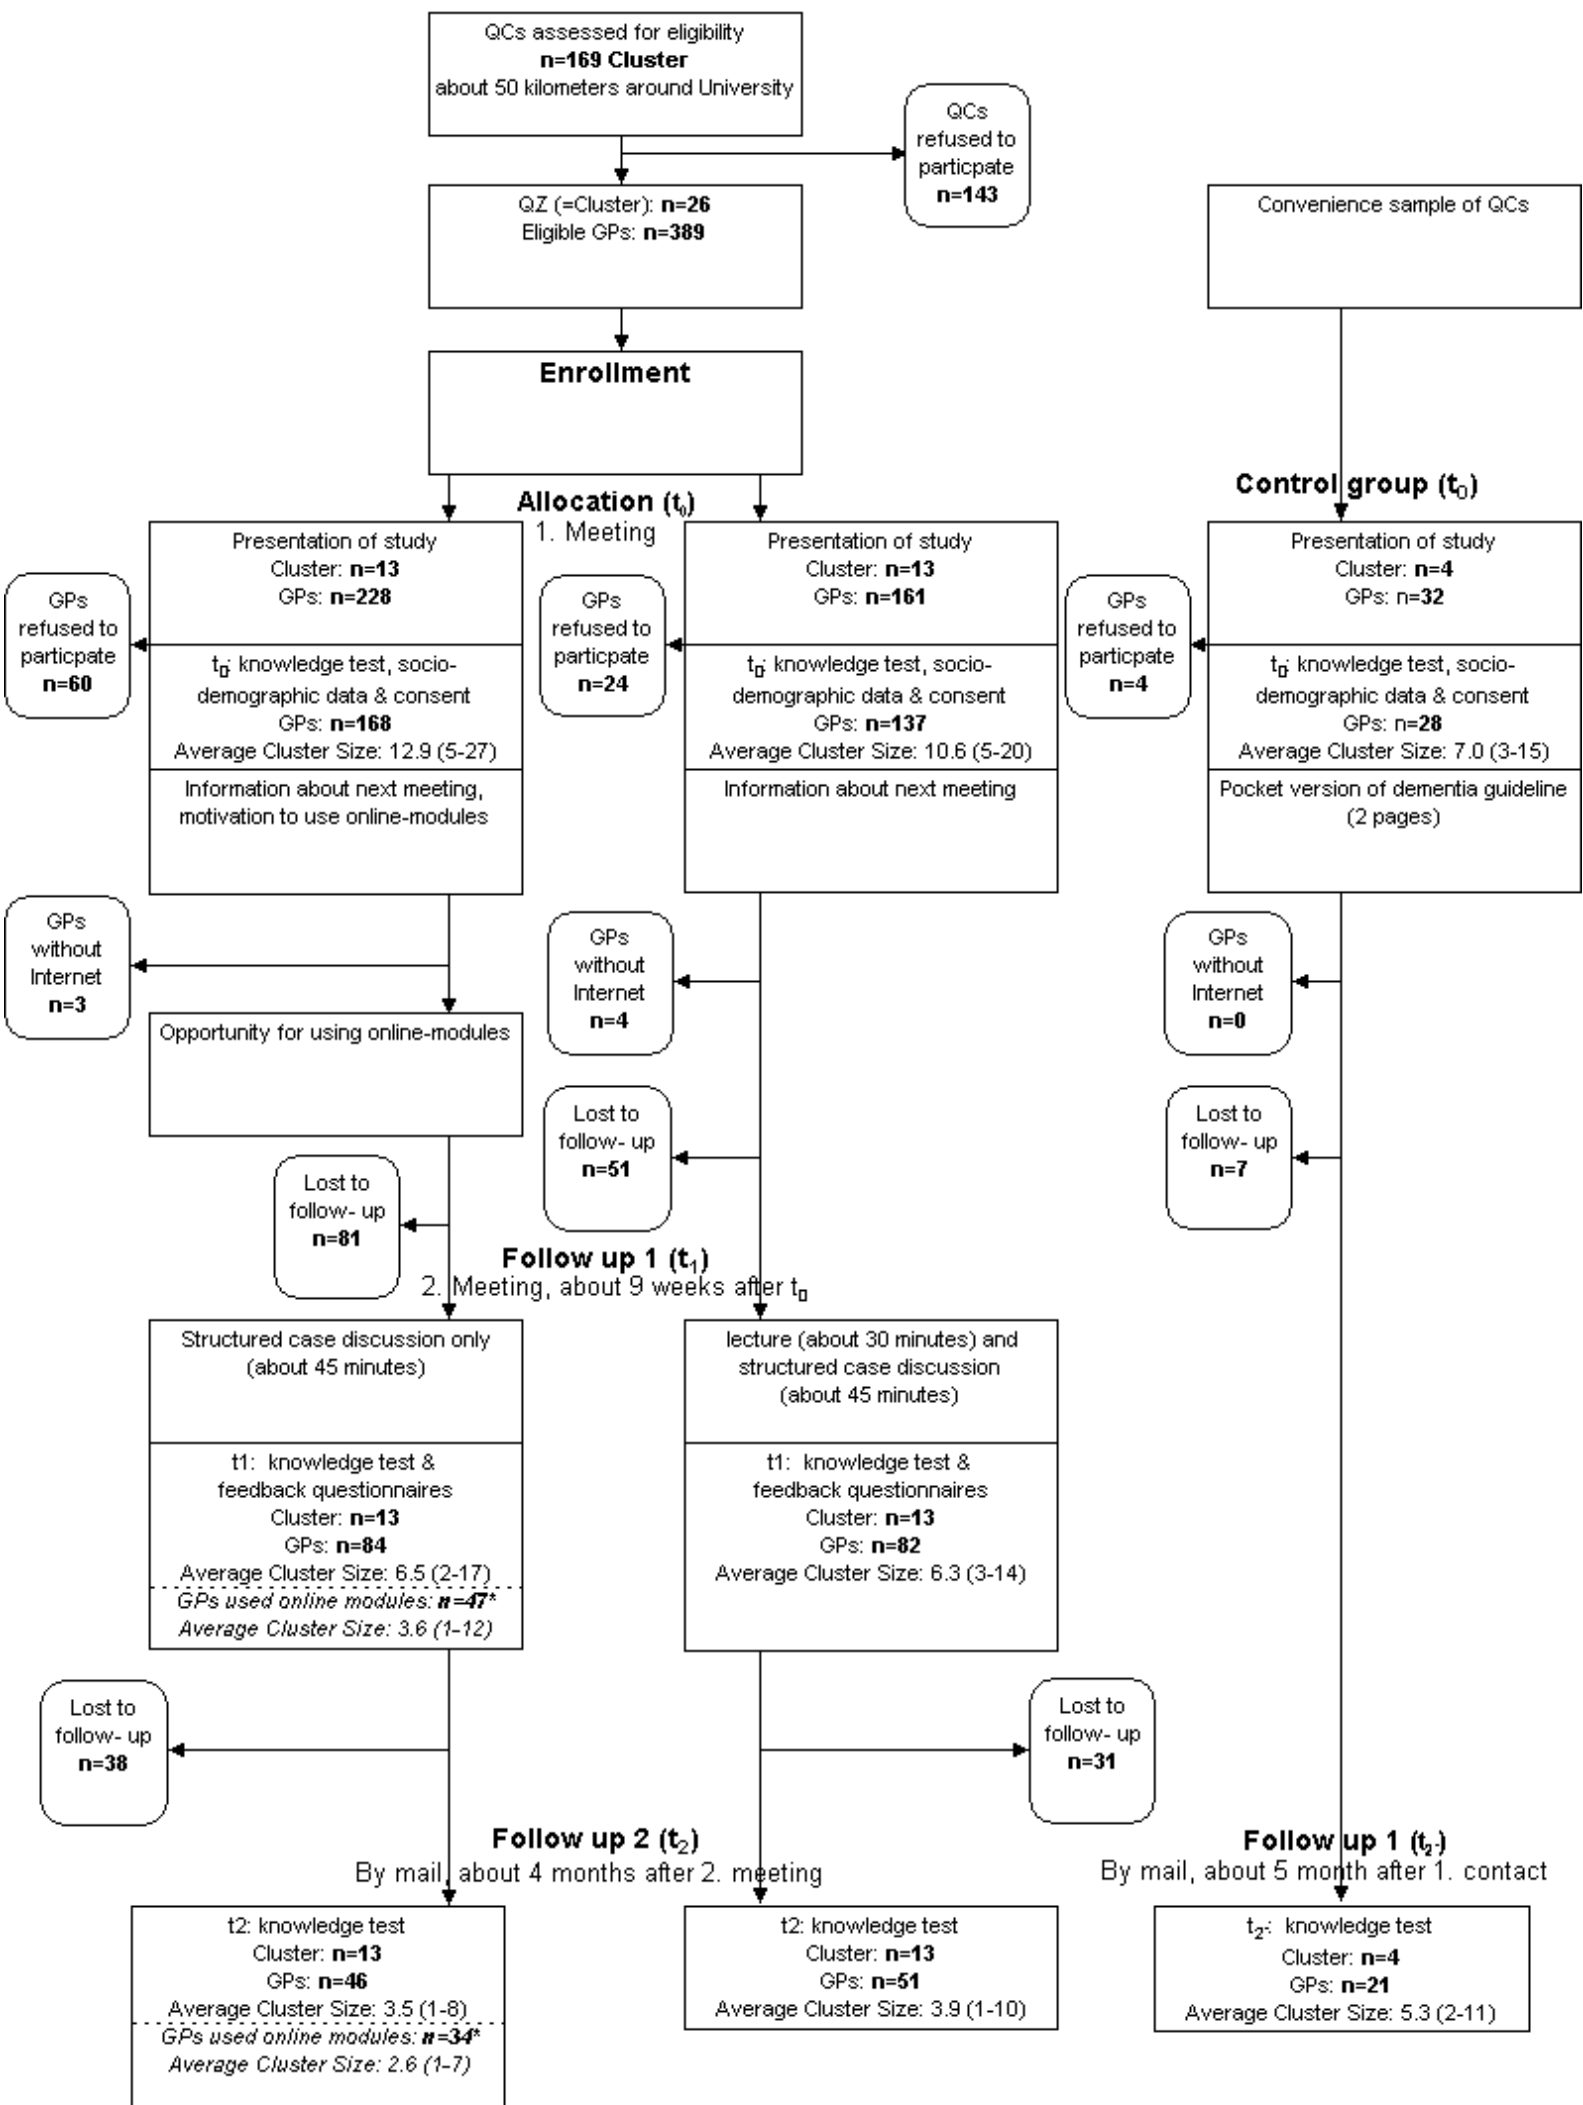

\*GPs gave this information retrospective at t<sub>1</sub>

Supplement: MOESM2 [file 9629504]
